# Supplementary material for: Template free-synthesis of cobalt–iron chalcogenides [Co0.8Fe0.2L2, L = S, Se] and their robust bifunctional electrocatalysis for the water splitting reaction and Cr(vi) reduction
Source: Royal Society of Chemistry journal article supplement (doi:10.1039/d2ra00447j), 2022-01-01
Supplement: d2ra00447j1.pdf [file d2ra00447j1.pdf]

## Supporting information

### Template free-synthesis of cobalt-iron chalcogenides [Co<sub>0.8</sub>Fe<sub>0.2</sub>L<sub>2</sub>, L = S, Se] and their Robust Bifunctional Electrocatalysis for Water Splitting Reaction and Cr(VI) Reduction

Manzoor Ahmad Pandit<sup>a</sup>, Dasari Sai Hemanth Kumar<sup>a</sup>, Manigandan Ramadoss<sup>a, b</sup>, Yuanfu Chen<sup>b</sup> and Krishnmurthi Muralidharan<sup>a\*</sup>

<sup>a</sup>School of Chemistry, University of Hyderabad, India.

<sup>a</sup>Email: murali@uohyd.ac.in

<sup>b</sup>School of Electronic Science and Engineering, University of Electronic Science and Technology of China, Chengdu 610054, PR China

| Figure no. | Title                                                                                                                                                                                 | Page no. |
|------------|---------------------------------------------------------------------------------------------------------------------------------------------------------------------------------------|----------|
| S1         | EDAS of Co <sub>0.8</sub> Fe <sub>0.2</sub> S <sub>2</sub> and Co <sub>0.8</sub> Fe <sub>0.2</sub> Se <sub>2</sub>                                                                    | 2        |
| S2         | Solid state UV-Visible DRS spectra of Co <sub>0.8</sub> Fe <sub>0.2</sub> S <sub>2</sub> and Co <sub>0.8</sub> Fe <sub>0.2</sub> Se <sub>2</sub>                                      | 2        |
| S3         | Peak current Vs Cr(VI) concentration and different scan rates of Co <sub>0.8</sub> Fe <sub>0.2</sub> S <sub>2</sub> and Co <sub>0.8</sub> Fe <sub>0.2</sub> Se <sub>2</sub> materials | 3        |

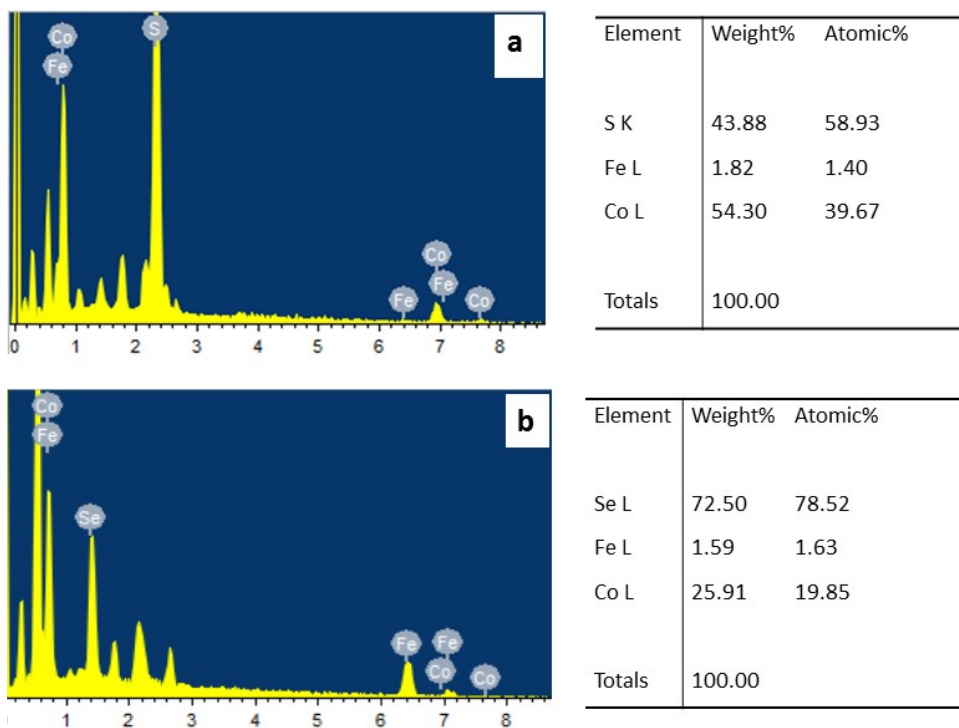

Figure S1. Elemental distribution by EDAS of  $\text{Co}_{0.8}\text{Fe}_{0.2}\text{S}_2$  and  $\text{Co}_{0.8}\text{Fe}_{0.2}\text{Se}_2$  respectively.

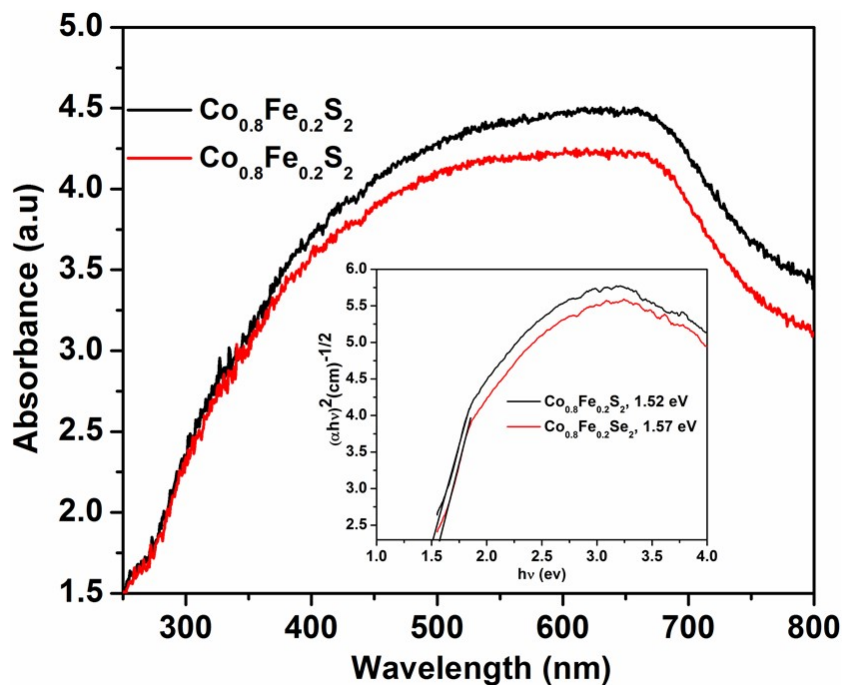

Figure S2. Solid state UV-visible DRS spectra of  $\text{Co}_{0.8}\text{Fe}_{0.2}\text{S}_2$  and  $\text{Co}_{0.8}\text{Fe}_{0.2}\text{Se}_2$  materials. The inset representing the band gap of the materials.

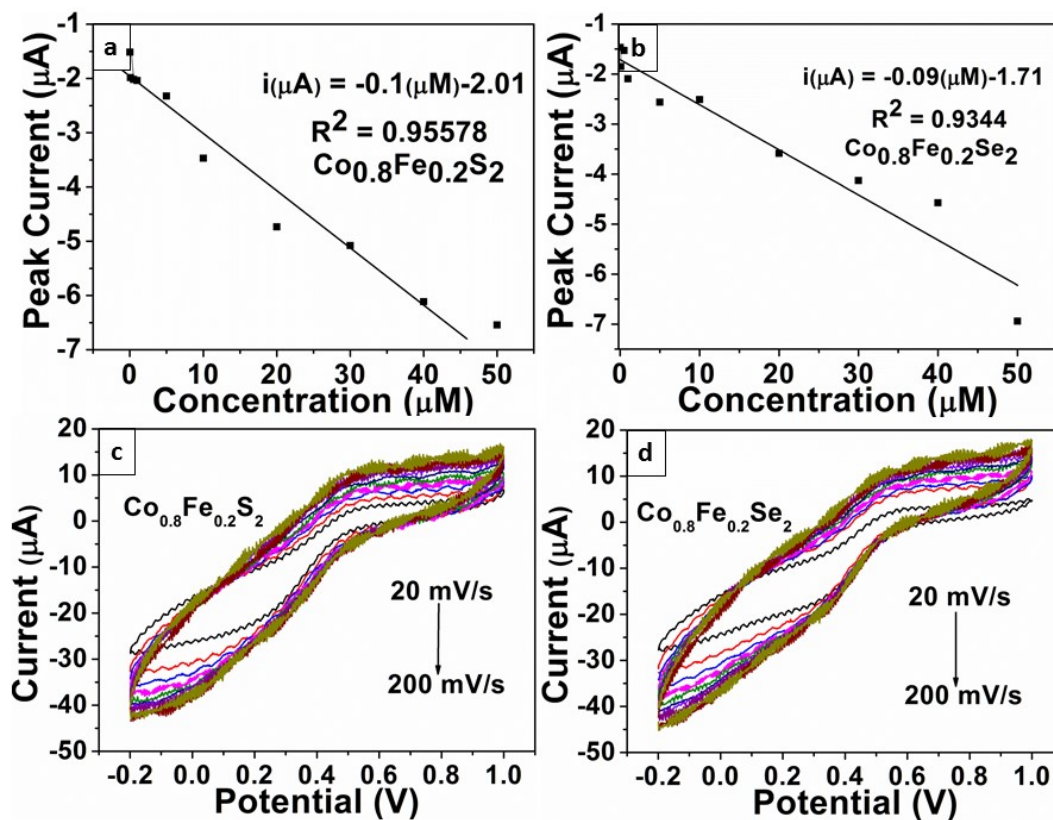

Figure S3. (a, b) Calibration plot of peak current against various Cr(VI) concentrations (c, d) Different scan rates ranging from 20 mV/s to 200 mV/s of  $\text{Co}_{0.8}\text{Fe}_{0.2}\text{S}_2$  and  $\text{Co}_{0.8}\text{Fe}_{0.2}\text{Se}_2$  materials.
